# Supplementary material for: Morphometric Analysis of Rat Prostate Development: Roles of MEK/ERK and Rho Signaling Pathways in Prostatic Morphogenesis
Source: MDPI journal article supplement (doi:10.3390/biom11121829), 2021-12-04
Supplement: s1 [file s1]

Supplemental video

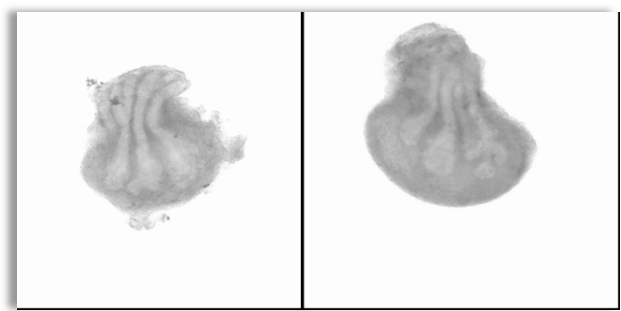

**Scheme 20.**  $\mu\text{M}$  U0126 over 90 hr. Representative videos from six separate sets of experiments are shown.

Supplemental figures

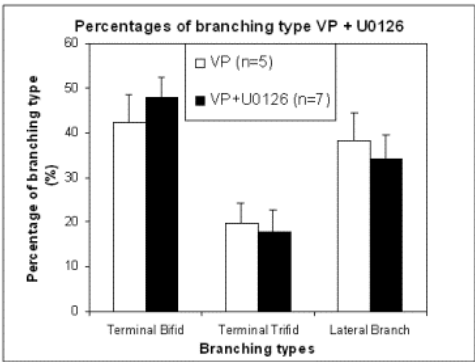

**Figure S1.** Percentage of branching events occurring as terminal bifids, terminal trifids or lateral side branches in VPs cultured in the absence or presence of 20  $\mu\text{M}$  U0126. Bars represent the mean  $\pm$  SEM for 5–7 sets of experiments.

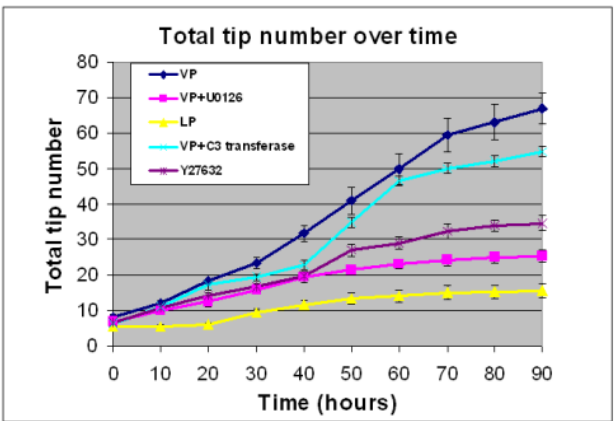

**Figure S2.** Total tip number in 3D analysis as a function of time in rat contralateral pnd 0 untreated VPs (dark blue), 20  $\mu\text{M}$  U0126 (red), C3-transferase (light blue) and 20  $\mu\text{M}$  Y-27632 treated VPs (purple) as well as LPs (yellow) cultured for 90 hr. Each data point represents the mean of 4 sets of experiments and bars denote SEM.

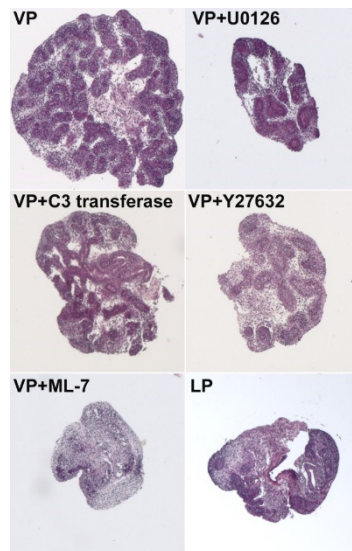

**Figure S3.** Representative images of H&E staining from cultured VPs with different treatments and LP cross sections.
